# Supplementary material for: One-step construction of Co2P nanoparticles encapsulated in N, P co-doped biomass-based porous carbon as bifunctional efficient electrocatalysts for overall water splitting
Source: Royal Society of Chemistry journal article supplement (doi:10.1039/d1se00062d), 2021-01-01
Supplement: d1se00062d1.pdf [file d1se00062d1.pdf]

## Supporting Information

### **One-step construction of Co<sub>2</sub>P nanoparticles encapsulated in N, P co-doped biomass-based porous carbon as bifunctional efficient electrocatalysts for overall water splitting**

Di Li<sup>a</sup>, Zengyong Li<sup>a</sup>, Jiaojiao Ma<sup>a</sup>, Xinwen Peng<sup>\*a</sup> and Chuanfu Liu<sup>\*a</sup>

\* Corresponding authors ([chfliu@scut.edu.cn](mailto:chfliu@scut.edu.cn), [fexwpeng@scut.edu.cn](mailto:fexwpeng@scut.edu.cn))

<sup>a</sup> State Key Laboratory of Pulp and Paper Engineering, School of Light Industry and Engineering, South China University of Technology, 381 Wushan Road, Guangzhou 510641, P. R. China

## Electrode preparation and electrochemical measurement

All electrochemical tests were conducted with a standard three-electrode system at the electrochemical workstation. A graphite rod and saturated calomel electrode (SCE) were used as the counter and reference electrode, respectively. All potentials were referenced to the reversible hydrogen electrode (RHE) by the equation  $E_{\text{RHE}} = E_{\text{(SCE)}} + 0.0591 \text{ pH} + 0.241$ . Typically, 2.5 mg of the catalyst powders was dispersed in 480  $\mu\text{L}$  of a 3:1 v/v water/ethanol mixed solvents along with 20  $\mu\text{L}$  of Nafion solution, and the mixture was sonicated for about 45 min to generate a homogeneous catalyst ink. Then, 5  $\mu\text{L}$  of the catalyst ink was drop-casting onto a polished glass carbon electrode, leading to a catalyst loading of 0.35  $\text{mg cm}^{-2}$ . Polarization curves were acquired by sweeping the potential from 0 to -0.8 V (vs SCE) at a potential sweep rate of 5 mV/s. Accelerated stability tests were performed in 0.5 M  $\text{H}_2\text{SO}_4$  at room temperature by potential cycling between 0 to -0.8 V (vs SCE) at a potential sweep rate of 100 mV/s for a given number of cycles. The pH durability of catalyst was processed in different electrolyte media (0.5 M  $\text{H}_2\text{SO}_4$ , 1 M KOH). In all measurements, the SCE reference electrode was calibrated with respect to a reversible hydrogen electrode (RHE). The electrochemical impedance spectroscopy (EIS) was carried out in the range from  $10^5$  to 0.01 Hz. All the experiments were processed at room temperature. The OER activities were measured by linear sweep voltammetry (LSV) method with a scan rate of 5  $\text{mV s}^{-1}$  at room temperature in 1 M KOH solution. The stability measurements were tested by cyclic voltammetry scanning 1000 cycles (CV, sweep rate, 100  $\text{mV s}^{-1}$ ) and long-term chronoamperometry method. EIS was

carried out in the range from  $10^5$  to 0.01 Hz. The electrochemically surface area (ECSA) also was investigated by CV to determine the electrochemical double-layer capacitances ( $C_{dl}$ ). For overall-water splitting studies, the full electrolyze configuration was assembled using  $\text{Co}_2\text{P@NPPC}$  loaded on a carbon cloth as a two-electrode with the catalyst loading of  $1.25 \text{ mg cm}^{-2}$ .

### **DFT calculations**

The VASP program<sup>1-2</sup> was used for calculations. PBE functional<sup>3</sup> was employed, and the ENCUT parameter was set to 500 eV. The reciprocal space was sampled with Gamma point. Both lattice parameters and atom positions were fully optimized for each structure.<sup>4</sup> The Grimme's D3BJ correction<sup>5</sup> was employed to take account of dispersion interaction.

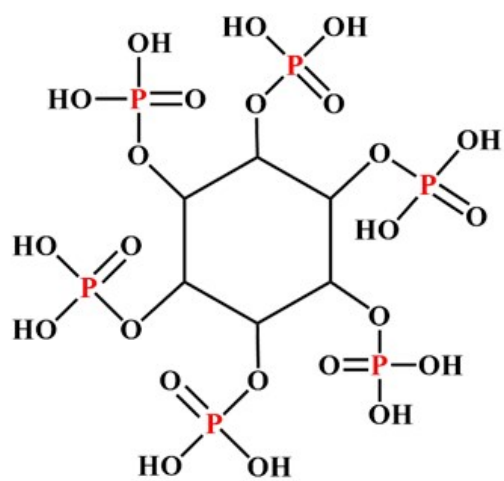

**Fig. S1.** Molecular structure of PA.

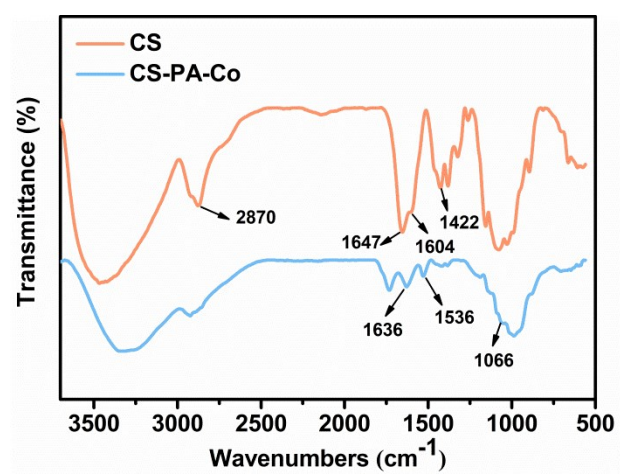

**Fig. S2.** FTIR spectra of CS and CS-PA-Co, respectively.

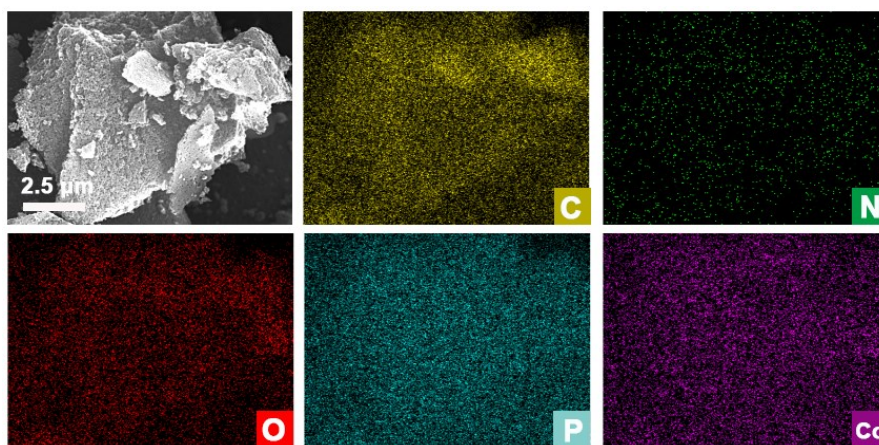

**Fig. S3.** Surface characterization of Co<sub>2</sub>P@NPPC. SEM image, and the corresponding EDS element mappings of C, N, O, P and Co.

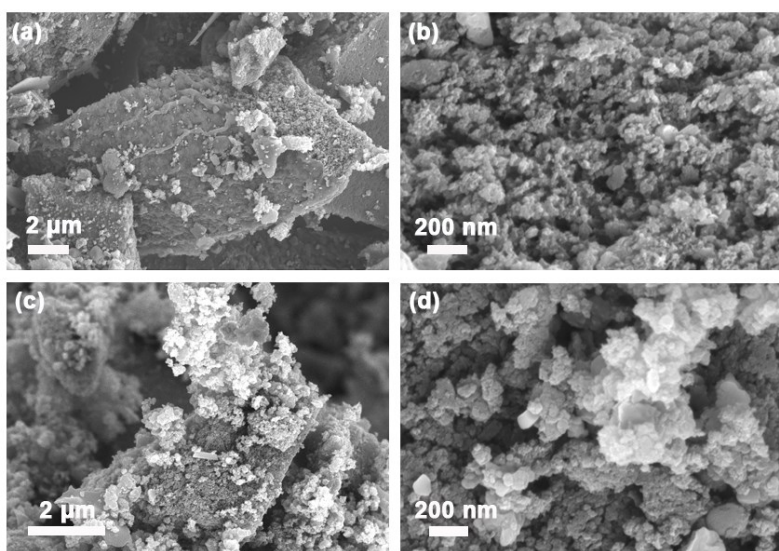

**Fig. S4.** SEM images of Co(PO<sub>3</sub>)<sub>2</sub>@NPPC-700 (a, b) and Co(PO<sub>3</sub>)<sub>2</sub>@NPPC-800 (c, d)

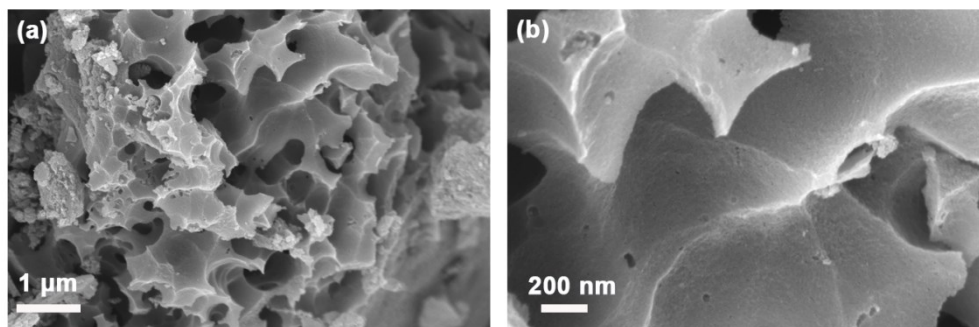

**Fig. S5.** Morphology and structure of the Co@NPC

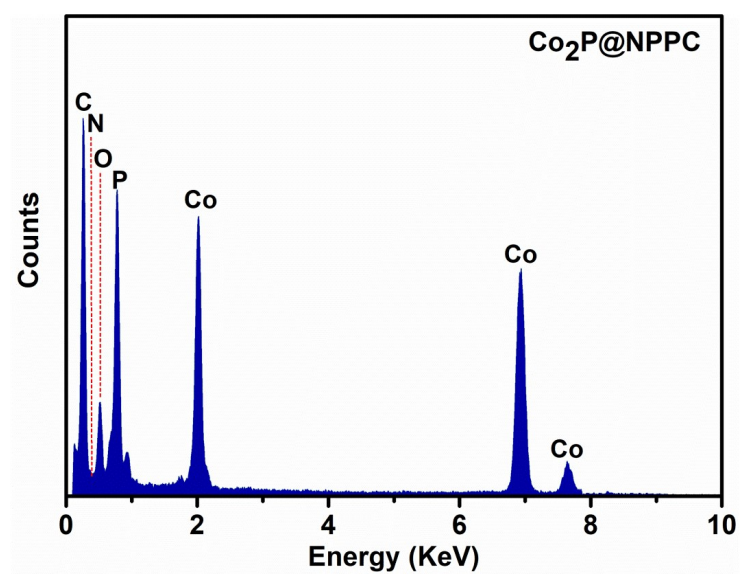

**Fig. S6.** EDX spectrum of the Co<sub>2</sub>P@NPPC

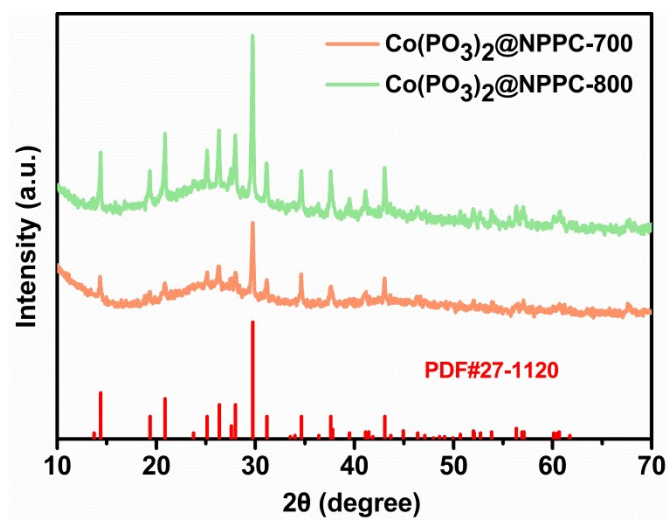

**Fig. S7.** X-ray diffraction (XRD) spectra of  $\text{Co(PO}_3)_2\text{@NPPC-700}$  and  $\text{Co(PO}_3)_2\text{@NPPC-800}$

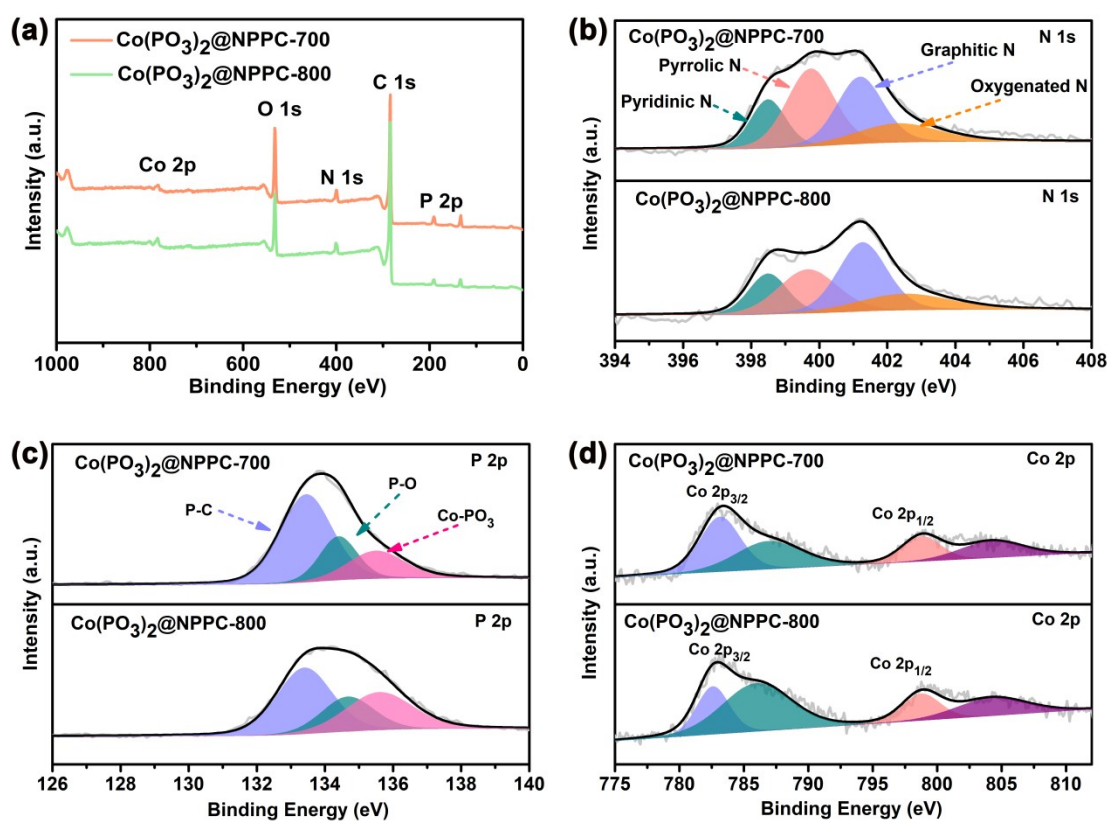

**Fig. S8.** (a) XPS survey spectrum, and (b-d) the high resolution XPS spectra of  $\text{Co}(\text{PO}_3)_2@\text{NPPC}-700$  and  $\text{Co}(\text{PO}_3)_2@\text{NPPC}-800$ .

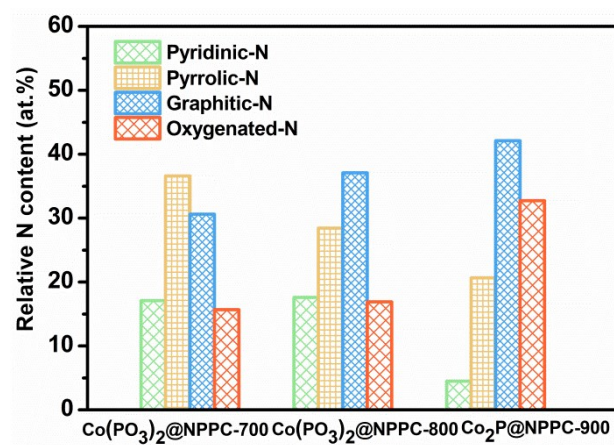

**Fig. S9.** The content of different N species in Co(PO<sub>3</sub>)<sub>2</sub>@NPPC-700, Co(PO<sub>3</sub>)<sub>2</sub>@NPPC-800 and Co<sub>2</sub>P@NPPC-900.

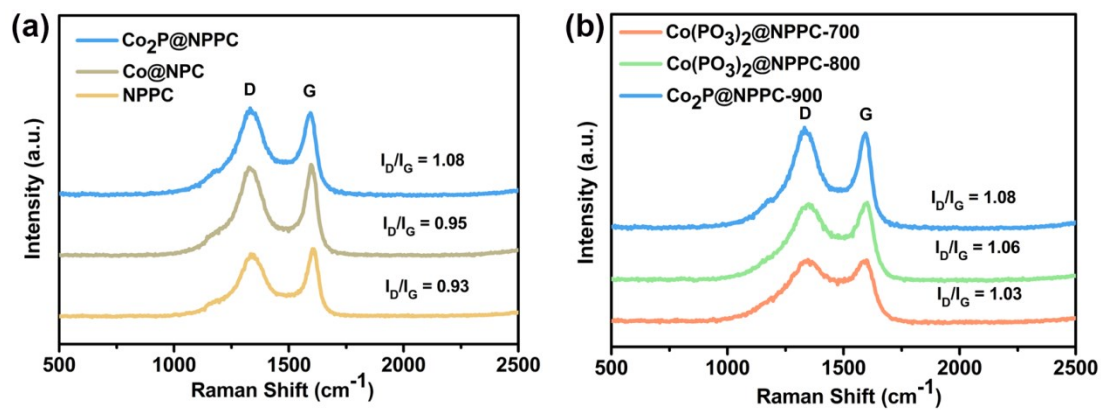

**Fig. S10.** Raman spectra of  $\text{Co}_2\text{P@NPPC}$ ,  $\text{Co@NPC}$  and NPPC (a), and samples pyrolyzed at different temperatures (b).

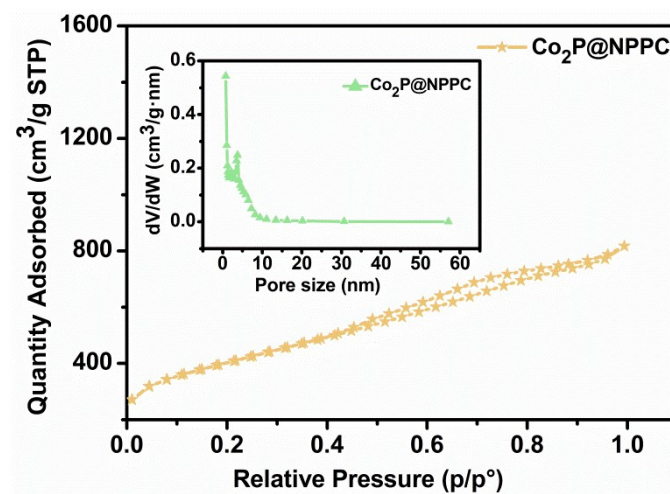

**Fig. S11.**  $N_2$  adsorption-desorption isotherms of  $Co_2P@NPPC$  and inset is the distributions of pores of  $Co_2P@NPPC$ .

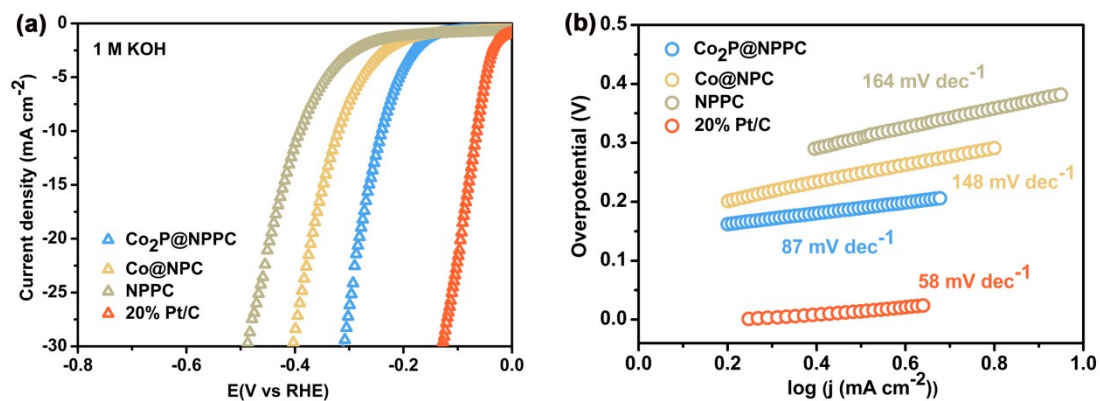

**Fig. S12.** (a) HER polarization curves of  $\text{Co}_2\text{P@NPPC}$ ,  $\text{Co@NPC}$ ,  $\text{NPPC}$  and  $\text{Pt/C}$  in 1 M KOH. (b) The corresponding Tafel slopes of all samples.

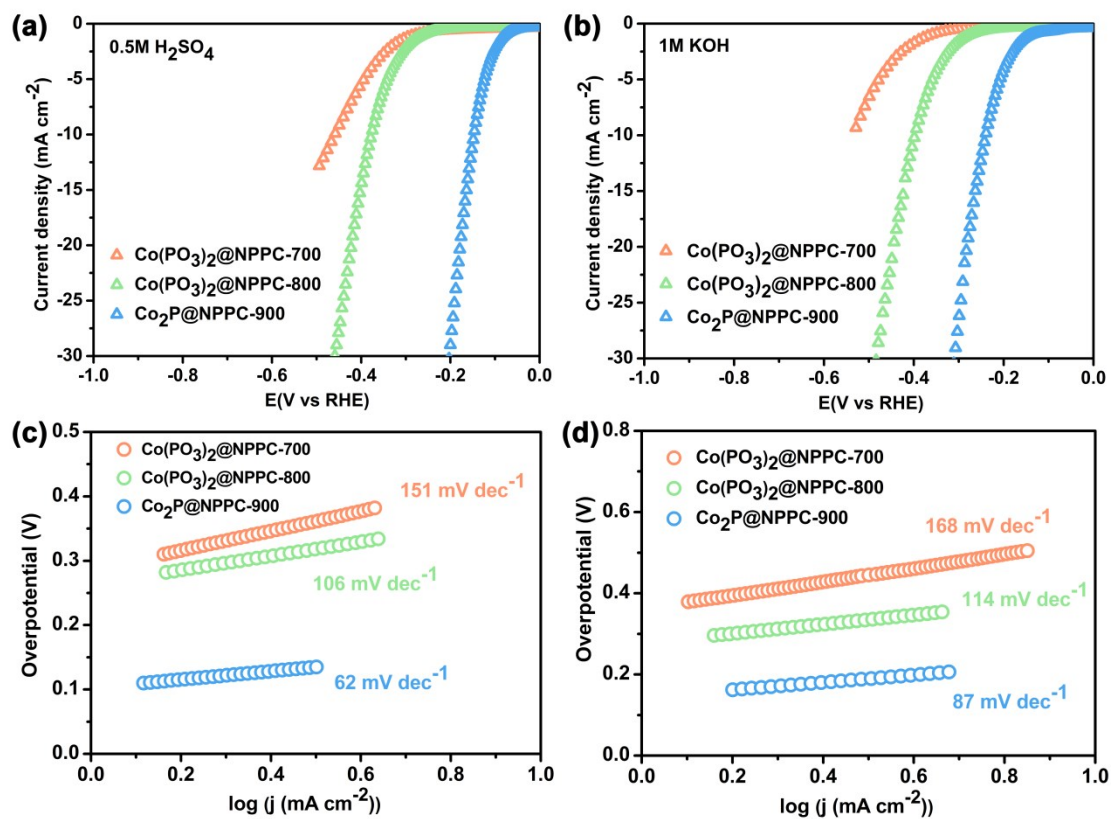

**Fig. S13.** (a, b) HER polarization curves and (c, d) the corresponding Tafel plots of  $\text{Co}_2\text{P}@ \text{NPPC-900}$ , and the compared samples in 0.5 M  $\text{H}_2\text{SO}_4$  and 1 M KOH with a scan rate of  $5 \text{ mV s}^{-1}$  at room temperature, respectively.

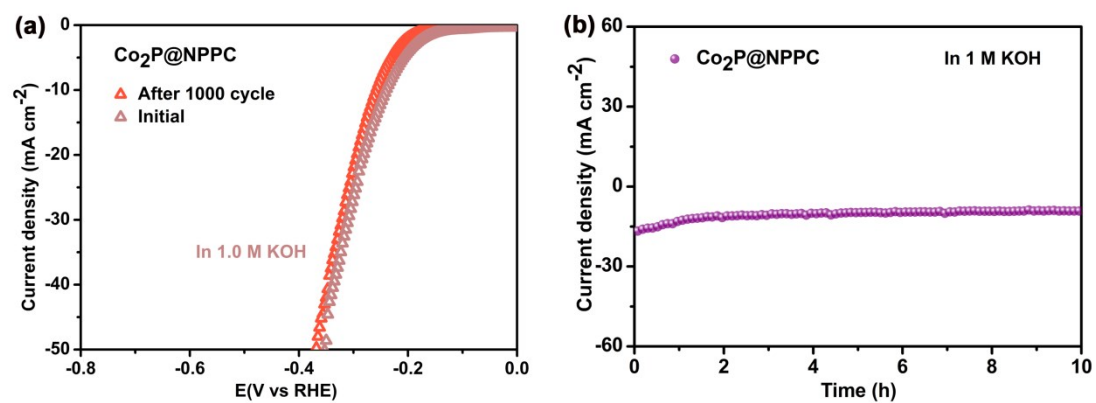

**Fig. S14.** (a) HER polarization curves of Co<sub>2</sub>P@NPPC before and after 1000 cycles of CV and (b) the insets are the chronoamperometric curves in 1 M KOH.

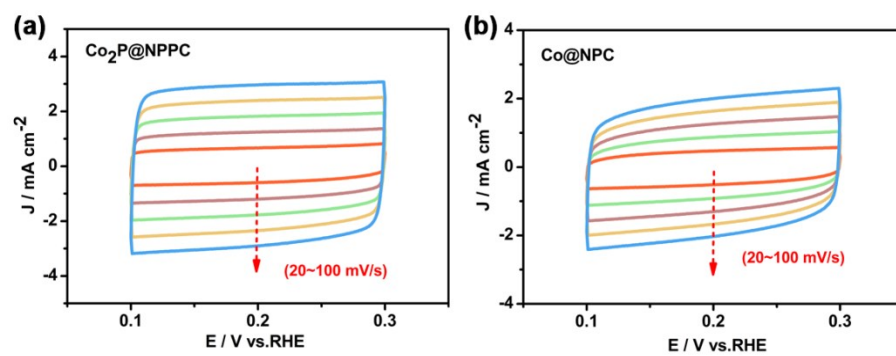

**Fig. S15.** (a, b) CV curves of  $\text{Co}_2\text{P@NPPC}$  and  $\text{Co@NPC}$  at different scan rates.

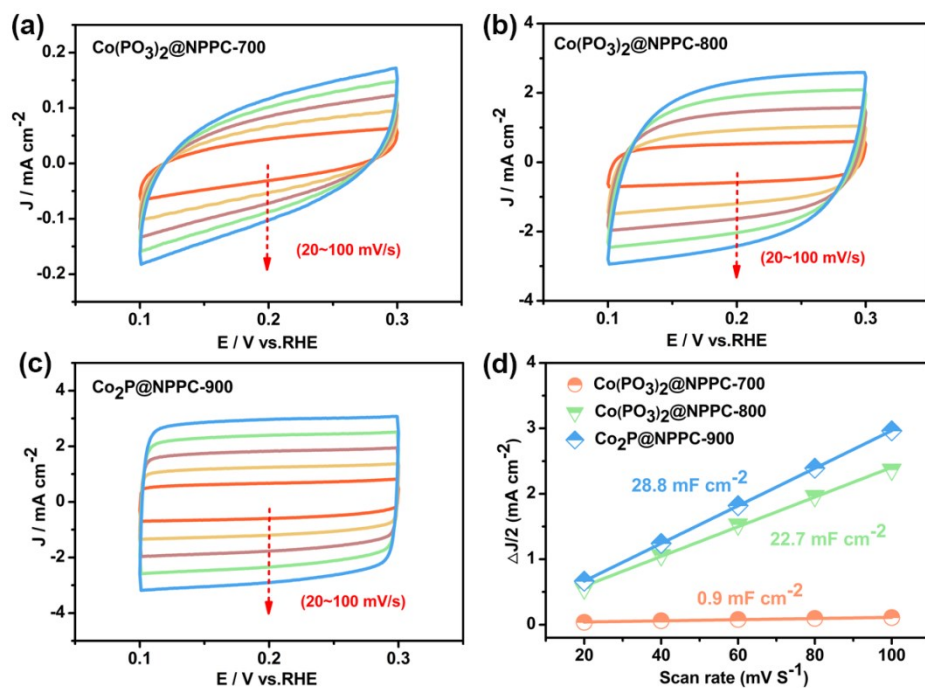

**Fig. S16.** (a-c) CV curves of  $\text{Co}_2\text{P}@\text{NPPC}$  and the compared samples pyrolyzed at different temperatures, and (d) the variation of double layer charging currents as a function of scan rate.

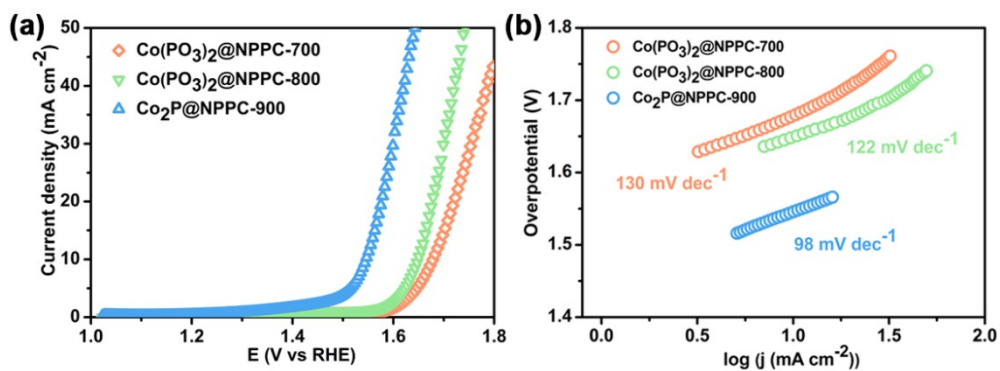

**Fig. S17.** (a) OER polarization curves and (b) the corresponding overpotentials at  $j = 10 \text{ mA cm}^{-2}$  in 1 M KOH of  $\text{Co}_2\text{P@NPPC}$ , and the compared samples pyrolyzed at different temperatures.

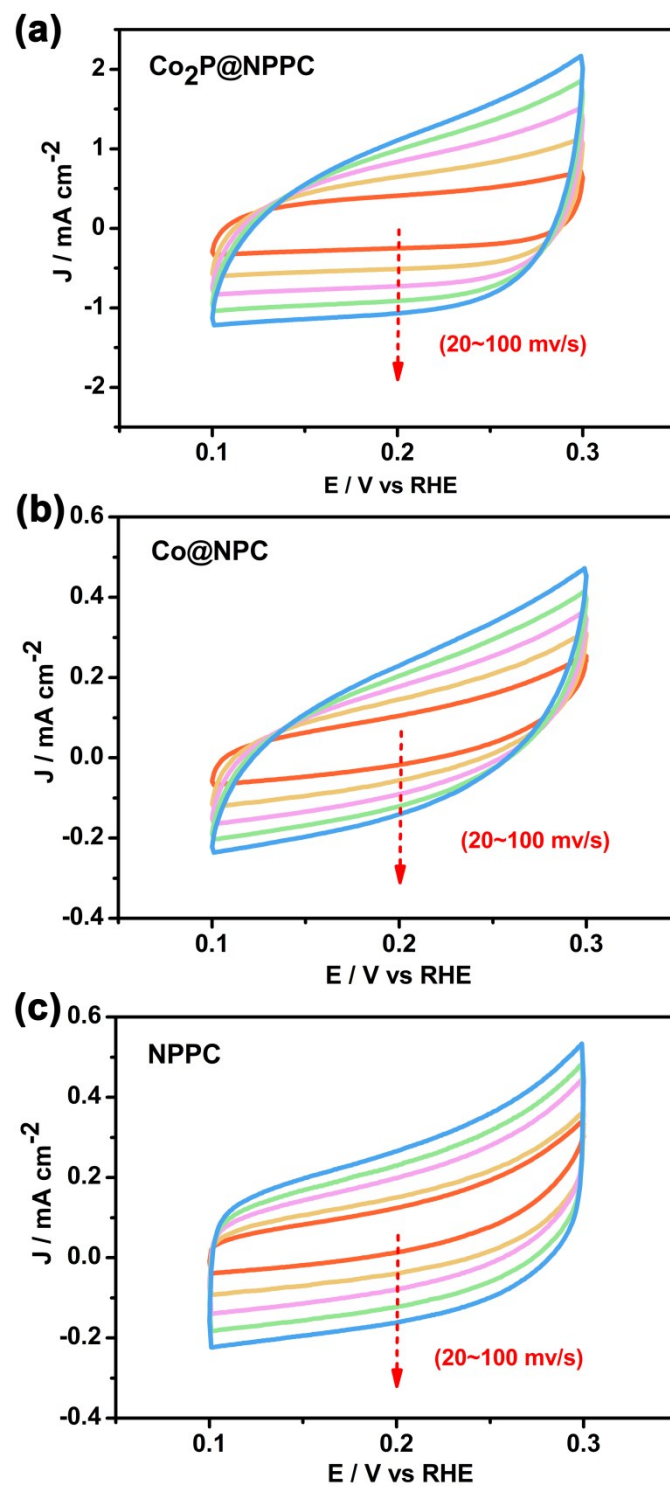

**Fig. S18.** CV curves of (a) Co<sub>2</sub>P@NPPC , (b) Co@NPC and (c) NPPC at different scan rates.

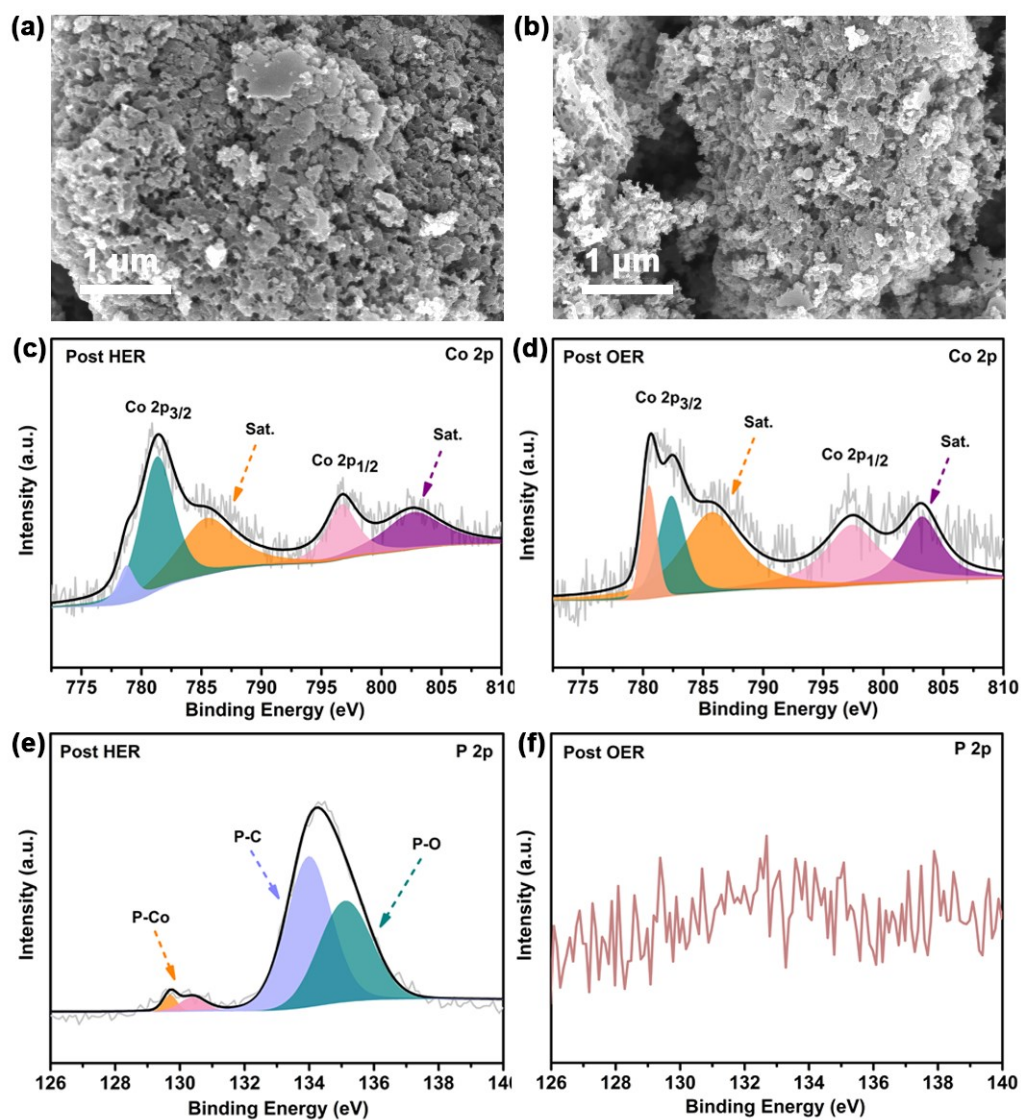

**Fig. S19.** (a, b) SEM images of  $\text{Co}_2\text{P@NPPC}$  after HER and OER test, respectively. High-resolution scans of (c, d) Co 2p and (e, f) P 2p spectra after HER and OER test.

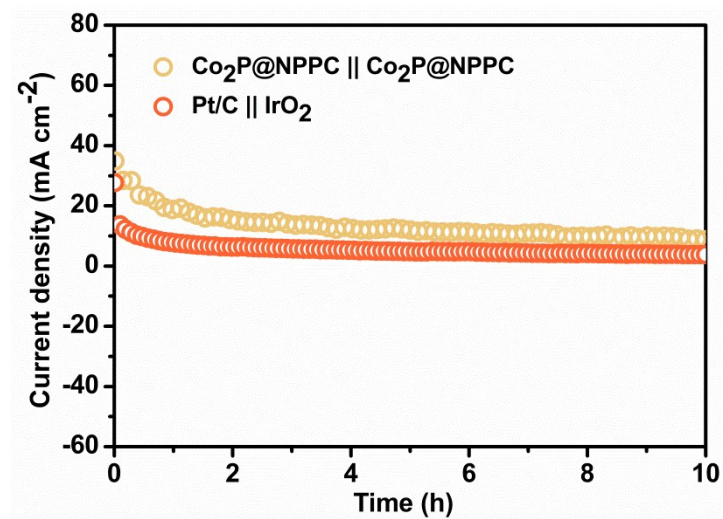

**Fig. S20.** Chronopotentiometric curve of water electrolysis in 1 M KOH.

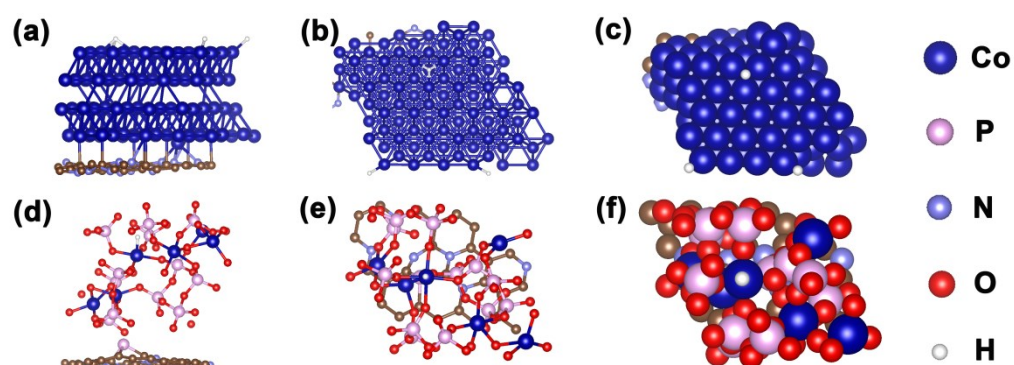

**Fig. S21.** Side view and top view of the models of Co@NPC (a, b and c) and Co(PO<sub>3</sub>)<sub>2</sub>@NPPC (d, e and f) of the optimized structure of H adsorption on Co and Co(PO<sub>3</sub>)<sub>2</sub>@NPPC surface, respectively.

Table S1. XPS elemental analysis of Co<sub>2</sub>P@NPPC and Co(PO<sub>3</sub>)<sub>2</sub>@NPPC samples.

| Samples  | Co(PO <sub>3</sub> ) <sub>2</sub> @NPPC-700 | Co(PO <sub>3</sub> ) <sub>2</sub> @NPPC-800 | Co <sub>2</sub> P@NPPC-900 |
|----------|---------------------------------------------|---------------------------------------------|----------------------------|
| C (at%)  | 73.23                                       | 79.7                                        | 88.21                      |
| N (at%)  | 4.54                                        | 3.87                                        | 1.73                       |
| O (at%)  | 17.24                                       | 12.68                                       | 7.34                       |
| P (at%)  | 4.27                                        | 2.99                                        | 1.68                       |
| Co (at%) | 0.71                                        | 0.75                                        | 1.03                       |

Table S2. The BET surface areas, BJH pore volume and Pore size of Co<sub>2</sub>P@NPPC

| Samples                | BET surface<br>areas<br>(m <sup>2</sup> /g) | Pore volume<br>(cm <sup>3</sup> /g) | Pore size<br>(nm) |
|------------------------|---------------------------------------------|-------------------------------------|-------------------|
| Co <sub>2</sub> P@NPPC | 1380                                        | 1.18                                | 3.44              |

Table S3. Comparison of HER performance in 0.5 M H<sub>2</sub>SO<sub>4</sub> solution for Co<sub>2</sub>P@NPPC with other non-noble metal electrocatalysts.

| Catalyst                                               | Voltage@10mA cm <sup>-2</sup><br>(mV) | Tafel slope<br>(mV dec <sup>-1</sup> ) | Reference                                                     |
|--------------------------------------------------------|---------------------------------------|----------------------------------------|---------------------------------------------------------------|
| Co <sub>2</sub> P@NPPC                                 | 147                                   | 62                                     | This work                                                     |
| Ni <sub>0.62</sub> Co <sub>0.38</sub> P                | 166                                   | 72                                     | <i>Adv. Funct. Mater.</i> <b>2016</b> , 26, 7644-7651         |
| MoP NSs/CFs                                            | 200                                   | 56                                     | <i>Appl. Catal. B</i> <b>2015</b> , 164, 144-150              |
| Co <sub>9</sub> S <sub>8</sub> @MoS <sub>2</sub> /CNFs | 190                                   | 110                                    | <i>Adv. Mater.</i> <b>2015</b> , 27, 4752-4759                |
| Fe <sub>0.43</sub> Co <sub>0.57</sub> S <sub>2</sub>   | 220                                   | 56                                     | <i>Energy Environ. Sci.</i> <b>2013</b> , 6, 3553-3558        |
| FeP                                                    | 250                                   | 67                                     | <i>Chem. Commun.</i> <b>2013</b> , 49, 6656-6658              |
| Co@NC                                                  | 210                                   | 108                                    | <i>J. Mater. Chem. A</i> <b>2014</b> , 2, 20067-20074         |
| Co@NC/NG                                               | 180                                   | 79                                     | <i>Chem. Mater.</i> <b>2015</b> , 27, 2026-2032               |
| NG/Co-doped C                                          | 229                                   | 126                                    | <i>Adv. Funct. Mater.</i> <b>2015</b> , 25, 872-882           |
| Au@Zn-Fe-C                                             | 123                                   | 78.2                                   | <i>ACS Catal.</i> <b>2016</b> , 6, 1045-1053                  |
| WP <sub>2</sub>                                        | 161                                   | 57                                     | <i>ACS Catal.</i> <b>2015</b> , 5, 145-149                    |
| Ni-Co-P nanocube                                       | 150                                   | 60.6                                   | <i>Chem. Commun.</i> <b>2016</b> , 52, 1633-1636              |
| Ni-Co-MoS <sub>2</sub>                                 | 155                                   | 51                                     | <i>Adv. Mater.</i> <b>2016</b> , 28, 9006-9011                |
| MoP@PC                                                 | 153                                   | 66                                     | <i>Angew. Chem. Int. Ed.</i> <b>2016</b> , 55, 12854-12858    |
| Fe doped NiS <sub>2</sub>                              | 198                                   | 42                                     | <i>J. Mater. Chem. A</i> <b>2019</b> , 7, 4971-4976           |
| CoP@NG                                                 | 158                                   | 63.8                                   | <i>Electrochim. Acta</i> <b>2019</b> , 307, 543-552           |
| CoP hollow polyhedra                                   | 159                                   | 59                                     | <i>ACS Appl. Mater. Interfaces</i> <b>2016</b> , 8, 2158-2165 |
| 2D Co <sub>2</sub> P                                   | 41                                    | 35                                     | <i>Nanoscale</i> , <b>2018</b> , 10, 6844-                    |

Table S4. Comparison of HER performance in 1 M KOH solution for Co<sub>2</sub>P@NPPC with other non-noble metal electrocatalysts.

| Catalyst                          | Voltage@10mA<br>cm <sup>-2</sup><br>(mV) | Tafel slope<br>(mV dec <sup>-1</sup> ) | Reference                                                           |
|-----------------------------------|------------------------------------------|----------------------------------------|---------------------------------------------------------------------|
| Co <sub>2</sub> P@NPPC            | 240                                      | 87                                     | This work                                                           |
| CoP/CC                            | 209                                      | 129                                    | <i>J. Am. Chem. Soc.</i> <b>2014</b> ,<br>136, 7587-7590            |
| CoOx@CN                           | 232                                      | 115                                    | <i>J. Am. Chem. Soc.</i> <b>2015</b> ,<br>137, 2688-2694            |
| NiCoP/rGO                         | 209                                      | 124.1                                  | <i>Adv. Funct. Mater.</i> <b>2016</b> ,<br>26, 6785-6796            |
| Co <sub>9</sub> S <sub>8</sub> @C | 250                                      | -                                      | <i>ACS Appl. Mater.<br/>Interfaces</i> <b>2015</b> , 7, 980-<br>988 |
| Mo <sub>2</sub> C                 | 270                                      | 78                                     | <i>J. Am. Chem. Soc.</i> <b>2015</b> ,<br>137, 7035-7038            |
| Co-NRCNTs                         | 370                                      | -                                      | <i>Angew. Chem. Int. Ed.</i><br><b>2014</b> , 53, 4372-4376         |
| CoO <sub>x</sub> @CN              | 232                                      | 115                                    | <i>J. Am. Chem. Soc.</i> <b>2015</b> ,<br>137, 2688-2694.           |
| Ni/Mo <sub>2</sub> C-PC           | 179                                      | 101                                    | <i>Chem. Sci.</i> <b>2017</b> , 8, 968-<br>973                      |
| Co-PCNFs                          | 249                                      | 92                                     | <i>J. Mater. Chem. A</i> <b>2016</b> ,<br>4, 12818-12824            |
| MnNi                              | 360                                      | -                                      | <i>Adv. Funct. Mater.</i> <b>2015</b> ,<br>25, 393-399              |
| FeP                               | 218                                      | 146                                    | <i>ACS Catal.</i> <b>2014</b> , 4,<br>4065-4069                     |
| Pt-Co <sub>2</sub> P              | 2                                        | 44                                     | <i>Energy Environ. Sci.</i><br><b>2020</b> , 13, 3110-3118          |

Table S5. Comparison of OER performance in 1 M KOH solution for Co<sub>2</sub>P@NPPC with other non-noble metal electrocatalysts.

| Catalyst                                               | Voltage@10mA cm <sup>-2</sup><br>(mV) | Tafel slope<br>(mV dec <sup>-1</sup> ) | Reference                                                        |
|--------------------------------------------------------|---------------------------------------|----------------------------------------|------------------------------------------------------------------|
| Co <sub>2</sub> P@NPPC                                 | 316                                   | 98                                     | This work                                                        |
| NiCoP                                                  | 340                                   | 86                                     | <i>Adv. Mater. Interfaces</i> <b>2016</b> , 3, 1500454           |
| PNC@Co                                                 | 370                                   | 76                                     | <i>J. Mater. Chem. A</i> <b>2016</b> , 4, 3204-3209.             |
| CoO <sub>x</sub> @CN                                   | 385                                   | -                                      | <i>J. Am. Chem. Soc.</i> <b>2015</b> , 137, 2688-2694            |
| CoP NPs/C                                              | 340                                   | 99                                     | <i>ACS Catal.</i> <b>2015</b> , 5, 6874-6878                     |
| Co <sub>3</sub> O <sub>4</sub> @C/CP                   | 370                                   | 82                                     | <i>Nano Energy</i> <b>2016</b> , 25, 42-50                       |
| CoFeO <sub>x</sub> film                                | 360                                   | -                                      | <i>J. Am. Chem. Soc.</i> <b>2013</b> , 135, 16977-16987          |
| Co <sub>9</sub> S <sub>8</sub> @MoS <sub>2</sub> /CNFs | 430                                   | 61                                     | <i>Adv. Mater.</i> <b>2015</b> , 27, 4752-4759                   |
| C-Co NPs                                               | 390                                   | -                                      | <i>J. Am. Chem. Soc.</i> <b>2015</b> , 137, 7071-7074            |
| Co-P film                                              | 345                                   | 47                                     | <i>Angew. Chem. Int. Ed.</i> <b>2015</b> , 54, 6251-6254         |
| CoP-MNA/Ni Foam                                        | 390                                   | 65                                     | <i>Adv. Funct. Mater.</i> <b>2015</b> , 25, 7337-7347            |
| Co-P@NC-800                                            | 370                                   | 79                                     | <i>ACS Appl. Mater. Interfaces</i> <b>2017</b> , 9, 40171-40179  |
| NiCoP/C nanoboxes                                      | 330                                   | 96                                     | <i>Angew. Chem. Int. Ed.</i> <b>2017</b> , 56, 3897-3900         |
| Co-C <sub>3</sub> N <sub>4</sub> /CNT                  | 380                                   | 68.4                                   | <i>J. Am. Chem. Soc.</i> <b>2017</b> , 139, 3336-3339            |
| Co-P/NC                                                | 354                                   | 52                                     | <i>Chem. Mater.</i> <b>2015</b> , 27, 7636-7642                  |
| Mo <sub>2</sub> C@CS                                   | 380                                   | 98                                     | <i>ChemSusChem</i> <b>2017</b> , 10, 3540-3546                   |
| Co <sub>3</sub> O <sub>4</sub> @BP                     | 400                                   | 63                                     | <i>ACS Appl. Mater. Interfaces</i> <b>2019</b> , 11, 17459-17466 |
| Co <sub>2</sub> P@NC-Fe <sub>2</sub> P                 | 260                                   | 41                                     | <i>ACS Appl. Mater. Interfaces</i> <b>2020</b> , 12, 25884-25894 |
| Co/P/N-CNP-5/NF                                        | 311                                   | 67.7                                   | <i>Electrochim. Acta</i> <b>2020</b> , 337,                      |

|                       |     |     |                                                      |
|-----------------------|-----|-----|------------------------------------------------------|
|                       |     |     | 135807                                               |
| CoO/Co <sub>x</sub> P | 370 | 101 | <i>J. Mater. Chem. A</i> <b>2020</b> , 8, 9177-9184. |

Table S6. Comparison with various electrocatalysts for overall water splitting in 1 M KOH solution

| Catalyst                                                                      | Voltage@10mA<br>cm <sup>-2</sup><br>(V) | Reference                                                        |
|-------------------------------------------------------------------------------|-----------------------------------------|------------------------------------------------------------------|
| Co <sub>2</sub> P@NPPC                                                        | 1.65                                    | This work                                                        |
| Co <sub>3</sub> O <sub>4</sub> crystals                                       | 1.91                                    | <i>Chem. Commun.</i> <b>2015</b> , 51, 8066-8069                 |
| Co-S sheets                                                                   | 1.743                                   | <i>ACS Nano</i> <b>2016</b> , 10, 2342-2348                      |
| Ni <sub>3</sub> S <sub>2</sub>                                                | 1.76                                    | <i>J. Am. Chem. Soc.</i> <b>2015</b> , 137, 14023-14026          |
| CoP/rGO                                                                       | 1.7                                     | <i>Chem. Sci.</i> <b>2016</b> , 7, 1690-1695                     |
| Ni <sub>5</sub> P <sub>4</sub>                                                | ~1.7                                    | <i>Angew. Chem. Int. Ed.</i> <b>2015</b> , 54, 12361-12365       |
| Co <sub>2</sub> B                                                             | 1.81                                    | <i>Adv. Energy Mater.</i> <b>2016</b> , 6, 1502313               |
| Co <sub>24</sub> Ni <sub>1</sub> B <sub>75</sub> @NF                          | 1.72                                    | <i>J. Mater. Chem. A</i> <b>2017</b> , 5, 12379-12384            |
| Ni <sub>x</sub> Co <sub>3-x</sub> O <sub>4</sub><br>  NiCo/NiCoO <sub>x</sub> | 1.75                                    | <i>ACS Appl. Mater. Interfaces</i> <b>2016</b> , 8, 3208-3214    |
| CoTe <sub>2</sub> @NCNTFs                                                     | 1.67                                    | <i>J. Mater. Chem. A</i> <b>2018</b> , 6, 3684-3691              |
| Mo <sub>2</sub> C@CS                                                          | 1.73                                    | <i>ChemSusChem</i> <b>2017</b> , 10, 3540-3546                   |
| Co-P/NC                                                                       | ~1.71                                   | <i>Chem. Mater.</i> <b>2015</b> , 27, 7636-7642                  |
| EG/Co <sub>0.85</sub> Se/NiFe-LDH                                             | 1.67                                    | <i>Energy Environ. Sci.</i> <b>2016</b> , 9, 478-483             |
| NiCo <sub>2</sub> S <sub>4</sub> NA                                           | 1.68                                    | <i>Nanoscale</i> <b>2015</b> , 7, 15122-15126                    |
| CoO/MoO <sub>x</sub>                                                          | 1.72                                    | <i>ACS Sustainable Chem. Eng.</i> <b>2016</b> , 4, 3743-3749     |
| Ni <sub>5</sub> P <sub>4</sub> film                                           | ~1.69                                   | <i>Angew. Chem. Int. Ed.</i> <b>2015</b> , 54, 12361-12365       |
| Cr <sub>0.2</sub> Co <sub>1.8</sub> P/CB                                      | 1.63                                    | <i>ACS Appl. Mater. Interfaces</i> <b>2020</b> , 12, 47397-47407 |
| BP/Co <sub>2</sub> P                                                          | 1.92                                    | <i>Angew. Chem. Int. Ed.</i> <b>2018</b> , 57, 2600-2604         |
| CoP-Co <sub>2</sub> P@PC                                                      | 1.57                                    | <i>Small</i> <b>2019</b> , 15, 1804546                           |

## Reference

- (1) G. Kresse; Furthmüller, J. Efficiency of ab-initio total energy calculations for metals and semiconductors using a plane-wave basis set. *Comput. Mater. Sci.* **1996**, *6*, 15-50.
- (2) G. Kresse; Furthmüller, J. Efficient iterative schemes for ab initio total-energy calculations using a plane-wave basis set. *Phys. Rev. B: Condens. Matter* **1996**, *54*, 11169-11186.
- (3) John P. Perdew; Kieron Burke; Ernzerhof, M. Generalized Gradient Approximation Made Simple. *Phys. Rev. Lett.* **1996**, *77*, 3865-3868.
- (4) Kong, F.; Longo, R. C.; Yeon, D.-H.; Yoon, J.; Park, J.-H.; Liang, C.; Kc, S.; Zheng, Y.; Doo, S.-G.; Cho, K. Multivalent Li-Site Doping of Mn Oxides for Li-Ion Batteries. *J. Phys. Chem. C* **2015**, *119*, 21904-21912.
- (5) Stefan Grimme; Jens Antony; Stephan Ehrlich; Krieg, H. A consistent and accurate ab initio parametrization of density functional dispersion correction (DFT-D) for the 94 elements H-Pu. *J. Chem. Phys.* **2010**, *132*, 154104.
